# Supplementary material for: Surfactant assisted formation of ruthenium nanochains under mild conditions and their catalytic CO oxidation activity
Source: Royal Society of Chemistry journal article supplement (doi:10.1039/c4cc09430a), 2015-01-01
Supplement: c4cc09430a1.pdf [file c4cc09430a1.pdf]

## Supporting Information

### **Surfactant assisted formation of Ruthenium nanochains under mild conditions and their catalytic CO oxidation activity**

**<sup>a</sup>S. Sreedhala<sup>a,b</sup> and C. P. Vinod<sup>a,b,c\*</sup>**

**Catalysis Division, CSIR-National Chemical Laboratory,**

**Dr. Homi Bhabha Road, Pune, INDIA – 411 008.**

**<sup>b</sup> Academy of Scientific and Innovative Research**

**(AcSIR), Anusandhan Bhawan, 2, Rafi Marg, New Delhi – 110 001.**

**<sup>c</sup>Center of Excellence on Surface Science, CSIR-National Chemical Laboratory**

**Dr. Homi Bhabha Road, Pune, INDIA – 411 008.**

**E-mail: [cp.vinod@ncl.res.in](mailto:cp.vinod@ncl.res.in)**

## Characterisation of Ruthenium Nanostructures

Characterization of the catalysts was done by

**X-ray Diffraction Analysis:** Powder X-ray diffraction (XRD) was measured on a PANalytical X'pert Pro dual goniometer diffractometer working under 40 kV and 30 mA. The Cu K $\alpha$  (1.5418 Å) radiation was used with a Ni filter.

**UV-Visible Spectroscopy:** Varian Cary 50 Conc UV-Vis spectrophotometer with a dual beam source was used for the UV-Visible analysis.

**Transmission Electron Microscopy (TEM):** TEM images were recorded by FEI Tecnai TF-30 and TF-20 electron microscope, operating at 300 kV and 200 kV . The Inductively coupled Plasmon analysis was done using Spectro Arcos ICP-OES.

The Dynamic Light Scattering experiments and zeta potential measurements were done with Brookhaven Instruments Corporation-90 plus Nanoparticle size analyser equipped with a 632.8 nm laser source.

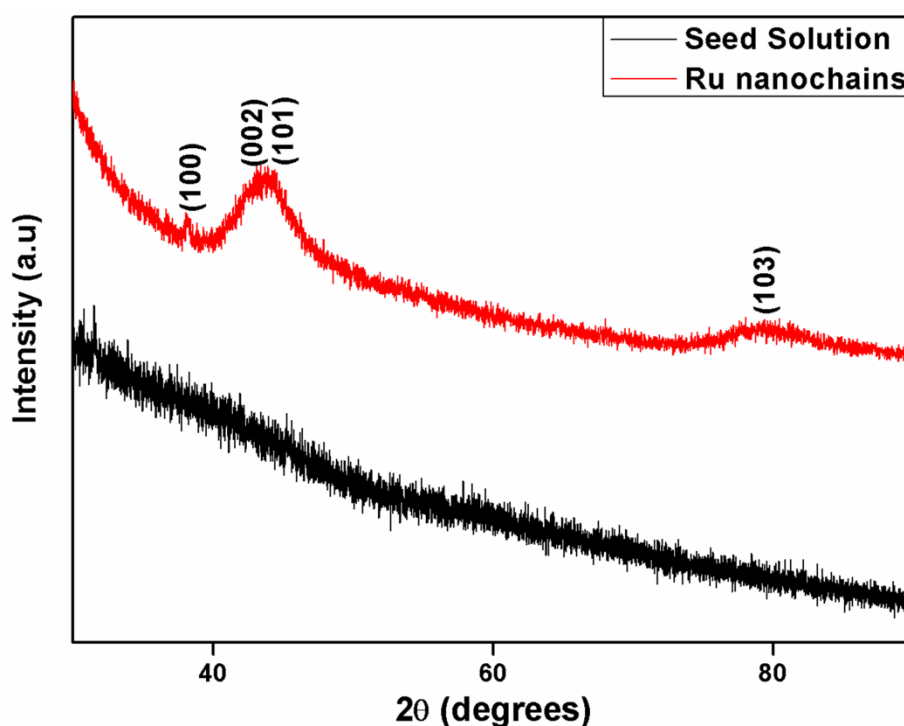

Fig S1: The XRD reflections of as synthesised Ru nanoseeds( $\sim 3.5\text{nm}$ ) and hcp Ru nanochains.

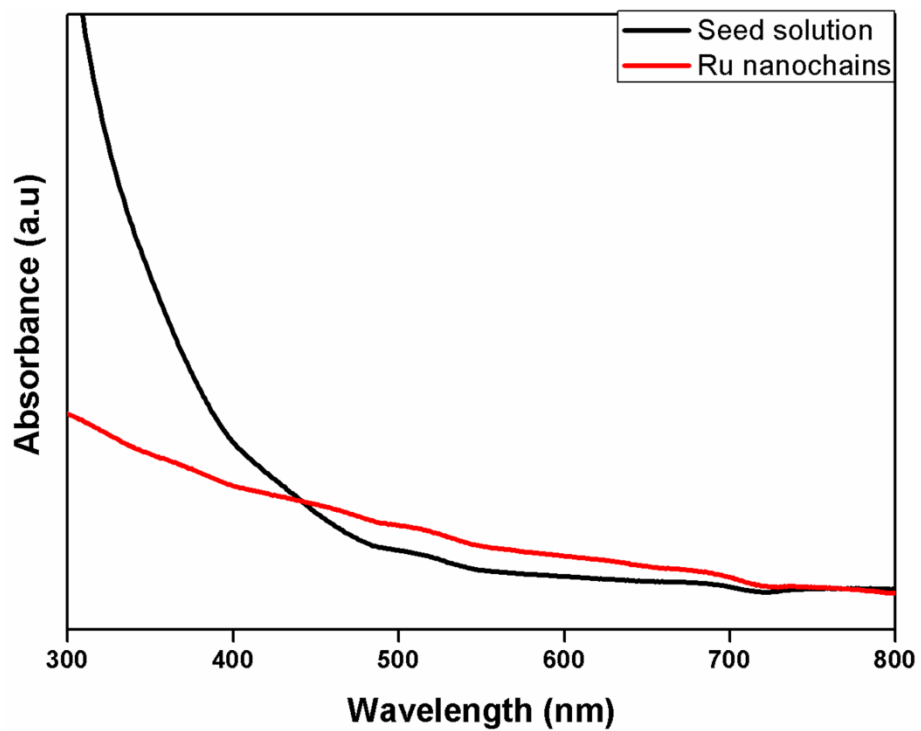

Fig S2: The UV-Visible spectrum of Ru seed solution and Ru nanochains.

| Time<br>(minutes) | Mean Diameter<br>(nm) |
|-------------------|-----------------------|
| 0                 | 68                    |
| 30                | 102                   |
| 60                | 127                   |
| 90                | 253                   |
| 120               | 262                   |
| 150               | 454                   |

Table1: The table shows the variation of mean diameter of Ru nanochains with time as obtained from DLS experiments

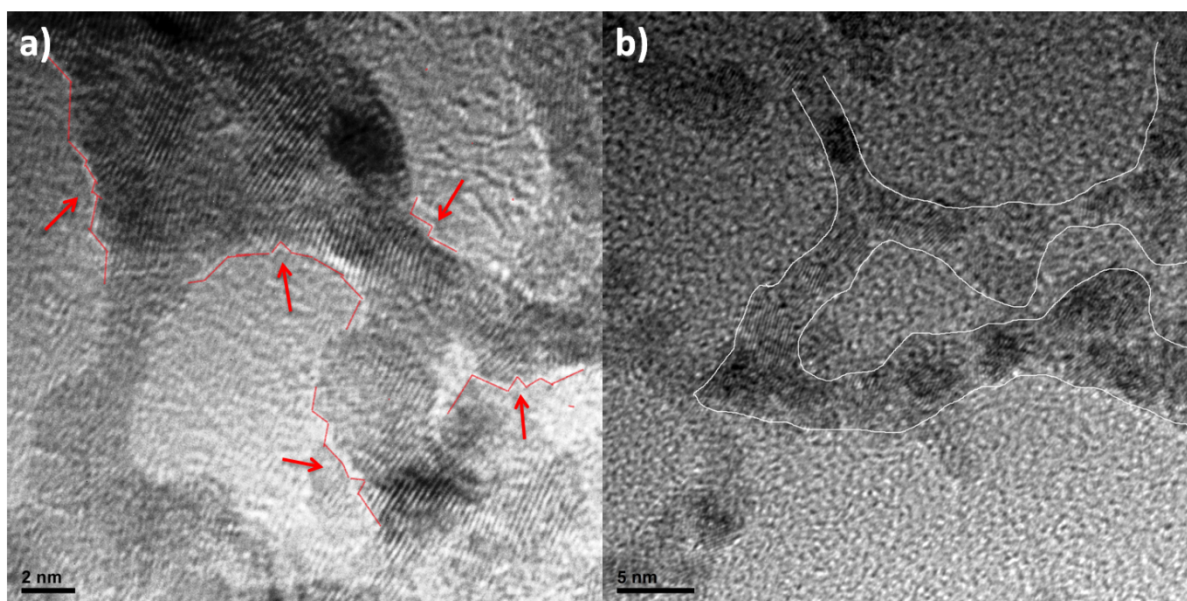

Fig S3: TEM image showing the under co-ordinated edges and the extended network of the Ru nanochains that are formed.

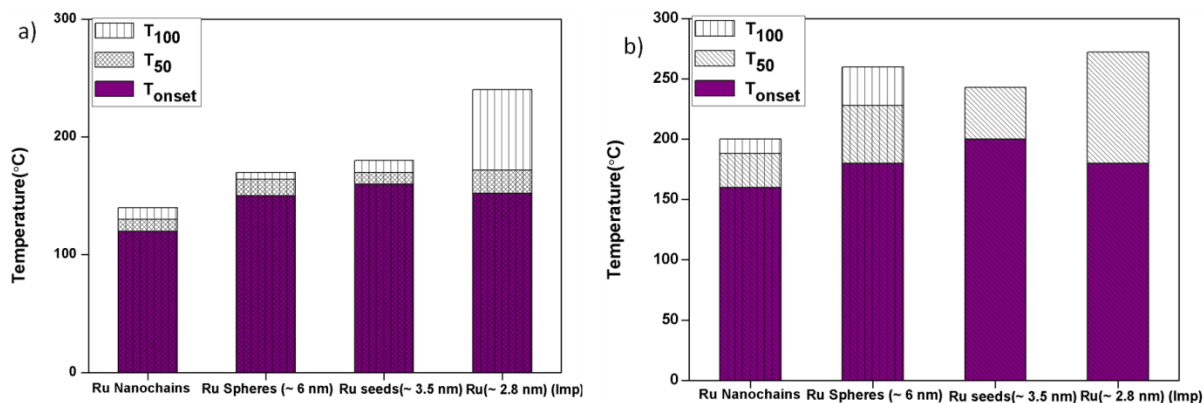

Fig S4: The CO oxidation activity profile for the Ru nanostructures supported on different supports a) TiO<sub>2</sub> b) SiO<sub>2</sub>

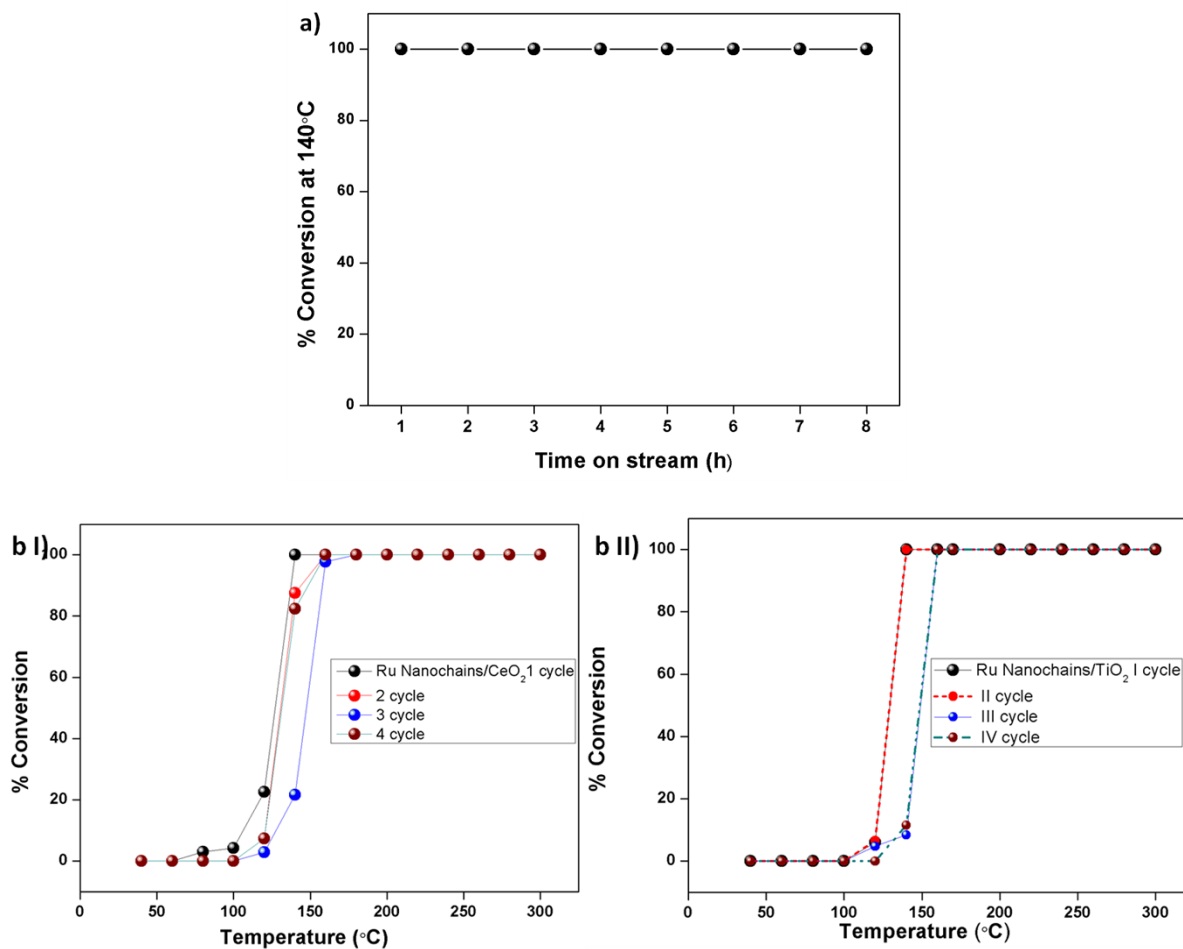

Fig S5:a) TOS of Ru nanochains/CeO<sub>2</sub> after 1<sup>st</sup> cycle at temperature of full conversion and b) stability of the I) Ru nanochains/CeO<sub>2</sub> and II) Ru nanochains/TiO<sub>2</sub> catalyst for four cycles.

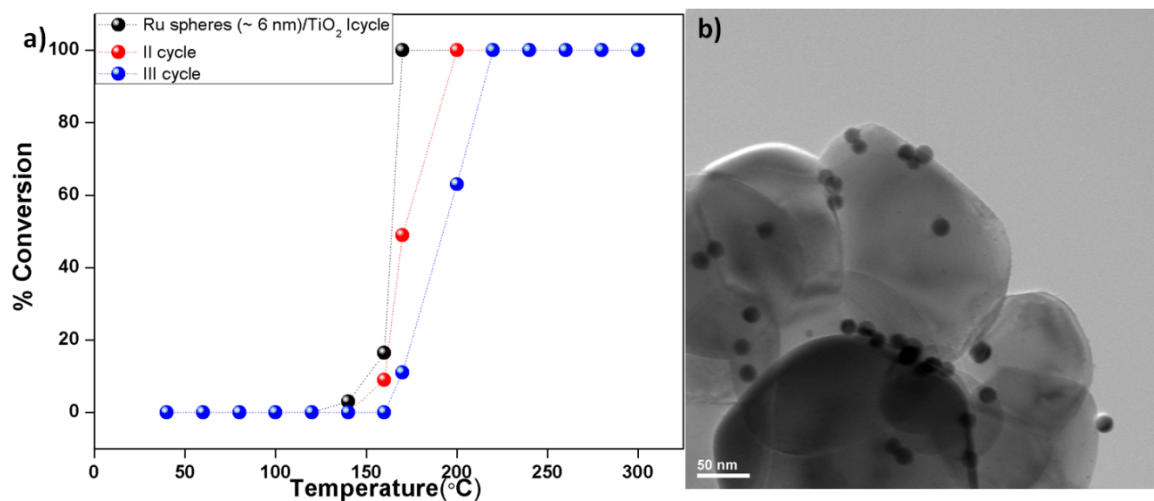

Fig S6: The CO oxidation plot for Ru spheres ( $\sim 6$  nm)/TiO<sub>2</sub>) upto three cycles and b) TEM of the spent catalyst which shows the increase in particle size after reaction.

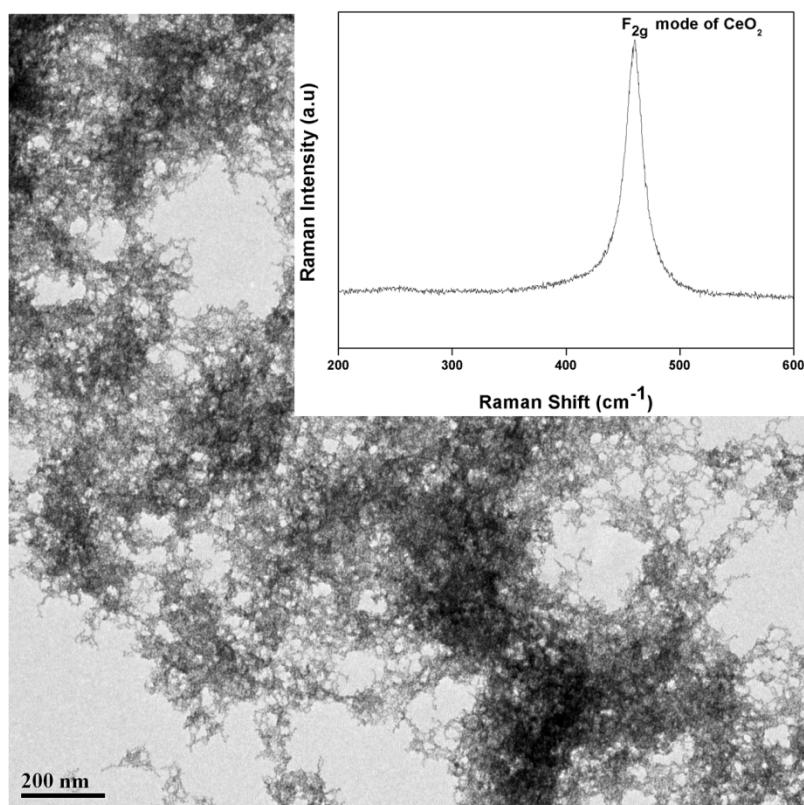

Fig S7: The TEM image showing the morphology of the spent catalyst supported on ceria, the inset shows the F<sub>2g</sub> vibrational mode of the cubic fluorite CeO<sub>2</sub>
